# Supplementary material for: Evidence on risk factors for knee osteoarthritis in middle-older aged: a systematic review and meta analysis
Source: PubMed Central journal article supplement (PMC10464102; doi:10.1186/s13018-023-04089-6), 2023-08-29
Supplement: 13018_2023_4089_MOESM1_ESM.pdf [file 13018_2023_4089_MOESM1_ESM.pdf]

Table 1 Search strategy used in PubMed database.

| Number | Search terms                              |
|--------|-------------------------------------------|
| 1      | knee osteoarthritis.ti, ab.               |
| 2      | degenerative knee arthritis. ti, ab.      |
| 3      | knee arthritis. ti, ab.                   |
| 4      | osteoarthritis of the knee. ti, ab.       |
| 5      | degenerative knee osteoarthritis. ti, ab. |
| 6      | or 1-5                                    |
| 7      | risk factor. ti, ab.                      |
| 8      | influence factor. ti, ab.                 |
| 9      | related factors. ti, ab.                  |
| 10     | pathogen. ti, ab.                         |
| 11     | Epidemiology. ti, ab.                     |
| 12     | or 7-10                                   |
| 13     | cohort. ti, ab.                           |
| 14     | cohort study. ti, ab.                     |
| 15     | prospective. ti, ab.                      |
| 16     | prospective trial. ti, ab.                |
| 17     | follow-up. ti, ab.                        |
| 18     | follow-up study. ti, ab.                  |
| 19     | or 12-17                                  |
| 20     | 6 and 11 and 18                           |

Table 2 Search strategy used in Web of Science database.

| Number | Search terms                              |
|--------|-------------------------------------------|
| 1      | knee osteoarthritis.ti, ab.               |
| 2      | degenerative knee arthritis. ti, ab.      |
| 3      | knee arthritis. ti, ab.                   |
| 4      | osteoarthritis of the knee. ti, ab.       |
| 5      | degenerative knee osteoarthritis. ti, ab. |
| 6      | or 1-5                                    |
| 7      | risk factor. ti, ab.                      |
| 8      | influence factor. ti, ab.                 |
| 9      | related factors. ti, ab.                  |
| 10     | pathogen. ti, ab.                         |
| 11     | Epidemiology. ti, ab.                     |
| 12     | or 7-10                                   |
| 13     | cohort. ti, ab.                           |
| 14     | cohort study. ti, ab.                     |
| 15     | prospective. ti, ab.                      |
| 16     | prospective trial. ti, ab.                |
| 17     | follow-up. ti, ab.                        |
| 18     | follow-up study. ti, ab.                  |

|    |                 |
|----|-----------------|
| 19 | or 12-17        |
| 20 | 6 and 11 and 18 |

Table 3 Search strategy used in OVID database.

| Number | Search terms                          |
|--------|---------------------------------------|
| 1      | knee osteoarthritis. ab.              |
| 2      | degenerative knee arthritis. ab.      |
| 3      | knee arthritis. ab.                   |
| 4      | osteoarthritis of the knee. ab.       |
| 5      | degenerative knee osteoarthritis. ab. |
| 6      | or 1-5                                |
| 7      | risk factor. ab.                      |
| 8      | influence factor. ab.                 |
| 9      | related factors. ab.                  |
| 10     | pathogen. ab.                         |
| 11     | Epidemiology. ab.                     |
| 12     | or 7-10                               |
| 13     | cohort. ab.                           |
| 14     | cohort study. ab.                     |
| 15     | prospective. ab.                      |
| 16     | prospective trial. ab.                |
| 17     | follow-up. ab.                        |
| 18     | follow-up study. ab.                  |
| 19     | or 12-17                              |
| 20     | 6 and 11 and 18                       |

Table 4 Search strategy used in CNKI database.

| Number | Search terms                    |
|--------|---------------------------------|
| 1      | xiguguanjieyan. tka.            |
| 2      | xiguanjieguguanjieyan. tka.     |
| 3      | xiguanjieguxingguanjieyan. tka. |
| 4      | Xiguxingguanjieyan. tka.        |
| 5      | or 1-4                          |
| 6      | weixianyinsu. tka.              |
| 7      | yingxiangyinsu. tka.            |
| 8      | xianguanyinsu. tka.             |
| 9      | or 6-8                          |
| 10     | 5 and 9                         |

Table 5 Search strategy used in Wanfang database.

| Number | Search terms                   |
|--------|--------------------------------|
| 1      | xiguguanjieyan. su.            |
| 2      | xiguanjieguguanjieyan. su.     |
| 3      | xiguanjieguxingguanjieyan. su. |
| 4      | Xiguxingguanjieyan. su.        |
| 5      | or 1-4                         |
| 6      | weixianyinsu. su.              |
| 7      | yingxiangyinsu. su.            |
| 8      | xianguanyinsu. su.             |
| 9      | or 6-8                         |
| 10     | 5 and 9                        |

Table 6 Search strategy used in Chongqing VIP database.

| Number | Search terms                   |
|--------|--------------------------------|
| 1      | xiguguanjieyan. ti.            |
| 2      | xiguanjieguguanjieyan. ti.     |
| 3      | xiguanjieguxingguanjieyan. ti. |
| 4      | Xiguxingguanjieyan. ti.        |
| 5      | or 1-4                         |
| 6      | weixianyinsu. ti.              |
| 7      | yingxiangyinsu. ti.            |
| 8      | xianguanyinsu. ti.             |
| 9      | or 6-8                         |
| 10     | 5 and 9                        |

Table 7 Search strategy used in SinoMed database.

| Number | Search terms                            |
|--------|-----------------------------------------|
| 1      | xiguguanjieyan. ti,ab,kw,su.            |
| 2      | xiguanjieguguanjieyan. ti,ab,kw,su.     |
| 3      | xiguanjieguxingguanjieyan. ti,ab,kw,su. |
| 4      | Xiguxingguanjieyan. ti,ab,kw,su.        |
| 5      | or 1-4                                  |
| 6      | weixianyinsu. ti,ab,kw,su.              |
| 7      | yingxiangyinsu. ti,ab,kw,su.            |
| 8      | xianguanyinsu. ti,ab,kw,su.             |
| 9      | or 6-8                                  |
| 10     | 5 and 9                                 |
