# Supplementary material for: Evidence on risk factors for knee osteoarthritis in middle-older aged: a systematic review and meta analysis
Source: PubMed Central journal article supplement (PMC10464102; doi:10.1186/s13018-023-04089-6), 2023-08-29
Supplement: 13018_2023_4089_MOESM2_ESM.pdf [file 13018_2023_4089_MOESM2_ESM.pdf]

## Appendix A The Assessment of quality for 17 case-control studies

| Study                    | Selection                        |                                 |                       |                        | Comparability                                                              | Exposure                  |                                                     |                   | Scores |
|--------------------------|----------------------------------|---------------------------------|-----------------------|------------------------|----------------------------------------------------------------------------|---------------------------|-----------------------------------------------------|-------------------|--------|
|                          | Is the case definition adequate? | Representativeness of the cases | Selection of Controls | Definition of Controls | Comparability of cases and controls on the basis of the design or analysis | Ascertainment of exposure | Same method of ascertainment for cases and controls | Non-Response rate |        |
| HuiYan Xu 2011[32]       | ★                                | ★                               | ★                     | ★                      | ★                                                                          | ★                         | ★                                                   | ☆                 | 7      |
| XiangXiang Song 2011[31] | ★                                | ★                               | ☆                     | ★                      | ★                                                                          | ☆                         | ★                                                   | ☆                 | 5      |
| YinChun Yang 2018[22]    | ★                                | ★                               | ☆                     | ★                      | ★                                                                          | ★                         | ★                                                   | ★                 | 7      |
| GuoLiang Sun 2008[16]    | ★                                | ★                               | ☆                     | ★                      | ★                                                                          | ★                         | ★                                                   | ★                 | 7      |
| ShengYu Wang 2021[18]    | ★                                | ★                               | ★                     | ★                      | ★★                                                                         | ★                         | ★                                                   | ☆                 | 8      |
| ChunHong He 2009[35]     | ★                                | ★                               | ☆                     | ★                      | ★                                                                          | ★                         | ★                                                   | ☆                 | 6      |
| Chang Zhao 2019[15]      | ★                                | ★                               | ☆                     | ★                      | ★                                                                          | ☆                         | ★                                                   | ☆                 | 5      |
| YanShui Lin 2012[28]     | ☆                                | ★                               | ☆                     | ★                      | ☆☆                                                                         | ☆                         | ★                                                   | ☆                 | 3      |

|                                |   |   |   |   |    |   |   |   |   |
|--------------------------------|---|---|---|---|----|---|---|---|---|
| JinZhi Zhao<br>2016[24]        | ☆ | ★ | ☆ | ★ | ☆☆ | ★ | ★ | ☆ | 4 |
| FuShun Zhang<br>2017[23]       | ☆ | ★ | ☆ | ★ | ☆☆ | ☆ | ★ | ☆ | 3 |
| Yong Liu<br>2021[17]           | ★ | ★ | ☆ | ★ | ☆☆ | ★ | ★ | ☆ | 4 |
| Nasrin<br>Moghimi<br>2019[19]  | ★ | ★ | ☆ | ★ | ★  | ★ | ★ | ☆ | 5 |
| Aziza<br>Mounach<br>2008[37]   | ★ | ★ | ☆ | ★ | ★★ | ★ | ★ | ☆ | 7 |
| Nabil El<br>Ayoubi<br>2013[27] | ★ | ★ | ☆ | ★ | ★  | ★ | ★ | ☆ | 6 |
| Holmberg S<br>2005[39]         | ★ | ★ | ★ | ★ | ★★ | ☆ | ★ | ☆ | 7 |
| Klussmann A<br>2010[34]        | ★ | ★ | ★ | ★ | ★  | ☆ | ★ | ☆ | 6 |
| Divya Sanghi<br>2015[26]       | ★ | ★ | ★ | ★ | ★  | ★ | ★ | ☆ | 7 |

---

## Appendix B The Assessment of quality for 12 Cohort studies

| Study                    | Selection                                |                                     |                           | Demonstration that outcome of interest was not present at start of study | Comparability                                                   | Exposure              |                                                 |                                  | Scores |
|--------------------------|------------------------------------------|-------------------------------------|---------------------------|--------------------------------------------------------------------------|-----------------------------------------------------------------|-----------------------|-------------------------------------------------|----------------------------------|--------|
|                          | Representativeness of the exposed cohort | Selection of the non exposed cohort | Ascertainment of exposure |                                                                          | Comparability of cohorts on the basis of the design or analysis | Assessment of outcome | Was follow-up long enough for outcomes to occur | Adequacy of follow up of cohorts |        |
| C Jinks 2008[38]         | ★                                        | ★                                   | ★                         | ★                                                                        | ★                                                               | ★                     | ★                                               | ★                                | 8      |
| Ryoya Takiguchi 2019[20] | ★                                        | ★                                   | ☆                         | ★                                                                        | ★★                                                              | ★                     | ★                                               | ☆                                | 7      |
| Ingham SL 2011[33]       | ★                                        | ★                                   | ☆                         | ★                                                                        | ★                                                               | ★                     | ★                                               | ☆                                | 6      |
| Muraki S 2012[29]        | ★                                        | ★                                   | ☆                         | ★                                                                        | ★                                                               | ★                     | ★                                               | ☆                                | 6      |
| Huétink K 2015[25]       | ★                                        | ★                                   | ☆                         | ★                                                                        | ★                                                               | ★                     | ★                                               | ★                                | 7      |
| Eiji Sasaki 2020[13]     | ★                                        | ★                                   | ☆                         | ★                                                                        | ★                                                               | ★                     | ☆                                               | ☆                                | 5      |
| Ito A 2020[14]           | ★                                        | ★                                   | ★                         | ★                                                                        | ★★                                                              | ★                     | ★                                               | ☆                                | 8      |
| Yoshimura N 2012[30]     | ★                                        | ★                                   | ★                         | ★                                                                        | ★                                                               | ★                     | ★                                               | ★                                | 8      |
| Konstari S               | ★                                        | ★                                   | ★                         | ★                                                                        | ★★                                                              | ★                     | ★                                               | ★                                | 9      |
