# Supplementary material for: Evidence on risk factors for knee osteoarthritis in middle-older aged: a systematic review and meta analysis
Source: PubMed Central journal article supplement (PMC10464102; doi:10.1186/s13018-023-04089-6), 2023-08-29
Supplement: 13018_2023_4089_MOESM3_ESM.pdf [file 13018_2023_4089_MOESM3_ESM.pdf]

**Author(s):**  
**Question:** Risk factors in KOA  
**Setting:**  
**Bibliography:**

| Certainty assessment                       |                       |                      |                      |              |             |                                                  | N <sub>2</sub> of patients |      | Effect                           |                                                       | Certainty        | Importance |
|--------------------------------------------|-----------------------|----------------------|----------------------|--------------|-------------|--------------------------------------------------|----------------------------|------|----------------------------------|-------------------------------------------------------|------------------|------------|
| N <sub>2</sub> of studies                  | Study design          | Risk of bias         | Inconsistency        | Indirectness | Imprecision | Other considerations                             | Risk factors               |      | Relative (95% CI)                | Absolute (95% CI)                                     |                  |            |
| <b>gender - cohort study</b>               |                       |                      |                      |              |             |                                                  |                            |      |                                  |                                                       |                  |            |
| 9                                          | observational studies | serious <sup>a</sup> | not serious          | not serious  | not serious | publication bias strongly suspected <sup>b</sup> | 6654/30087 (22.1%)         | 0/0  | <b>OR 1.10</b><br>(0.98 to 1.24) | <b>1 fewer per 1,000</b><br>(from 1 fewer to 1 fewer) | ⊕○○○<br>Very low | CRITICAL   |
| <b>gender - case-control study</b>         |                       |                      |                      |              |             |                                                  |                            |      |                                  |                                                       |                  |            |
| 8                                          | observational studies | serious <sup>a</sup> | serious <sup>c</sup> | not serious  | not serious | publication bias strongly suspected <sup>b</sup> | 2674 cases 2829 controls   |      | <b>OR 1.05</b><br>(0.99 to 1.12) | -                                                     | ⊕○○○<br>Very low | CRITICAL   |
|                                            |                       |                      |                      |              |             |                                                  | -                          | 0.0% |                                  |                                                       |                  |            |
| <b>age - cohort study</b>                  |                       |                      |                      |              |             |                                                  |                            |      |                                  |                                                       |                  |            |
| 4                                          | observational studies | serious <sup>a</sup> | not serious          | not serious  | not serious | none                                             | 4014/6413 (62.6%)          | -/0  | <b>OR 1.04</b><br>(1.02 to 1.06) | <b>1 fewer per --</b><br>(from 1 fewer to 1 fewer)    | ⊕○○○<br>Very low | CRITICAL   |
| <b>age - case-control study</b>            |                       |                      |                      |              |             |                                                  |                            |      |                                  |                                                       |                  |            |
| 7                                          | observational studies | serious <sup>a</sup> | not serious          | not serious  | not serious | none                                             | 3098 cases 3243 controls   |      | <b>OR 1.01</b><br>(1.00 to 1.01) | -                                                     | ⊕○○○<br>Very low | CRITICAL   |
|                                            |                       |                      |                      |              |             |                                                  | -                          | 0.0% |                                  |                                                       |                  |            |
| <b>BMI - cohort study</b>                  |                       |                      |                      |              |             |                                                  |                            |      |                                  |                                                       |                  |            |
| 5                                          | observational studies | serious <sup>a</sup> | not serious          | not serious  | not serious | publication bias strongly suspected <sup>b</sup> | 4085/7797 (52.4%)          | -/0  | <b>OR 1.06</b><br>(1.04 to 1.09) | <b>1 fewer per 1,000</b><br>(from 1 fewer to 1 fewer) | ⊕○○○<br>Very low | CRITICAL   |
| <b>BMI - case-control study</b>            |                       |                      |                      |              |             |                                                  |                            |      |                                  |                                                       |                  |            |
| 6                                          | observational studies | serious <sup>a</sup> | serious <sup>c</sup> | not serious  | not serious | publication bias strongly suspected <sup>b</sup> | 2765 cases 3183 controls   |      | <b>OR 1.04</b><br>(1.00 to 1.08) | -                                                     | ⊕○○○<br>Very low | CRITICAL   |
|                                            |                       |                      |                      |              |             |                                                  | -                          | 0.0% |                                  |                                                       |                  |            |
| <b>BMI≥24kg/m2 - cohort study</b>          |                       |                      |                      |              |             |                                                  |                            |      |                                  |                                                       |                  |            |
| 6                                          | observational studies | serious <sup>a</sup> | not serious          | not serious  | not serious | publication bias strongly suspected <sup>b</sup> | 3106/22915 (13.6%)         | -/0  | <b>OR 1.29</b><br>(1.02 to 1.63) | <b>1 fewer per --</b><br>(from 2 fewer to 1 fewer)    | ⊕○○○<br>Very low | CRITICAL   |
| <b>BMI≥24kg/m2 - case-control study</b>    |                       |                      |                      |              |             |                                                  |                            |      |                                  |                                                       |                  |            |
| 5                                          | observational studies | serious <sup>a</sup> | not serious          | not serious  | not serious | publication bias strongly suspected <sup>b</sup> | 1974 cases 1734 controls   |      | <b>OR 1.32</b><br>(1.00 to 1.74) | -                                                     | ⊕○○○<br>Very low | CRITICAL   |
|                                            |                       |                      |                      |              |             |                                                  | -                          | 0.0% |                                  |                                                       |                  |            |
| <b>Trauma history - case-control study</b> |                       |                      |                      |              |             |                                                  |                            |      |                                  |                                                       |                  |            |
| 2                                          | observational studies | serious <sup>a</sup> | not serious          | not serious  | not serious | publication bias strongly suspected <sup>b</sup> | 1517 cases 1648 controls   |      | <b>OR 1.53</b><br>(0.71 to 3.33) | -                                                     | ⊕○○○<br>Very low | IMPORTANT  |
|                                            |                       |                      |                      |              |             |                                                  | -                          | 0.0% |                                  |                                                       |                  |            |
| <b>Trauma history - cohort study</b>       |                       |                      |                      |              |             |                                                  |                            |      |                                  |                                                       |                  |            |
| 4                                          | observational studies | serious <sup>a</sup> | not serious          | not serious  | not serious | publication bias strongly suspected <sup>b</sup> | 1825/15481 (11.8%)         | -/0  | <b>OR 1.34</b><br>(0.99 to 1.82) | <b>1 fewer per --</b><br>(from 2 fewer to 1 fewer)    | ⊕○○○<br>Very low | IMPORTANT  |

| case-control study - moist              |                       |                      |                      |             |             |                                                  |                          |      |                                 |                                                |                  |               |
|-----------------------------------------|-----------------------|----------------------|----------------------|-------------|-------------|--------------------------------------------------|--------------------------|------|---------------------------------|------------------------------------------------|------------------|---------------|
| 3                                       | observational studies | serious <sup>a</sup> | not serious          | not serious | not serious | publication bias strongly suspected <sup>b</sup> | 1622 cases 1768 controls |      | OR 1.94<br>(0.38 to 9.96)       | -                                              | ⊕○○○<br>Very low | NOT IMPORTANT |
|                                         |                       |                      |                      |             |             |                                                  | -                        | 0.0% |                                 | 0 fewer per --<br>(from 0 fewer to 0 fewer)    |                  |               |
| case-control study - sunless            |                       |                      |                      |             |             |                                                  |                          |      |                                 |                                                |                  |               |
| 2                                       | observational studies | serious <sup>a</sup> | not serious          | not serious | not serious | publication bias strongly suspected <sup>b</sup> | 1506 cases 1621 controls |      | OR 2.03<br>(0.33 to 12.47)      | -                                              | ⊕○○○<br>Very low | NOT IMPORTANT |
|                                         |                       |                      |                      |             |             |                                                  | -                        | 0.0% |                                 | 0 fewer per --<br>(from 0 fewer to 0 fewer)    |                  |               |
| case-control study - moist+sunless      |                       |                      |                      |             |             |                                                  |                          |      |                                 |                                                |                  |               |
| 2                                       | observational studies | serious <sup>a</sup> | not serious          | not serious | not serious | publication bias strongly suspected <sup>b</sup> | 1506 cases 1621 controls |      | OR 2.60<br>(0.12 to 56.64)      | -                                              | ⊕○○○<br>Very low | NOT IMPORTANT |
|                                         |                       |                      |                      |             |             |                                                  | -                        | 0.0% |                                 | 0 fewer per --<br>(from 0 fewer to 0 fewer)    |                  |               |
| case-control study - cold               |                       |                      |                      |             |             |                                                  |                          |      |                                 |                                                |                  |               |
| 1                                       | observational studies | serious <sup>a</sup> | not serious          | not serious | not serious | publication bias strongly suspected <sup>b</sup> | 116 cases 147 controls   |      | OR 1.95<br>(0.00 to 4285259.42) | -                                              | ⊕○○○<br>Very low | NOT IMPORTANT |
|                                         |                       |                      |                      |             |             |                                                  | -                        | 0.0% |                                 | 0 fewer per --<br>(from 0 fewer to --)         |                  |               |
| case-control study - Junior high school |                       |                      |                      |             |             |                                                  |                          |      |                                 |                                                |                  |               |
| 2                                       | observational studies | serious <sup>a</sup> | not serious          | not serious | not serious | publication bias strongly suspected <sup>b</sup> | 1496 cases 1647 controls |      | OR 1.21<br>(0.62 to 2.36)       | -                                              | ⊕○○○<br>Very low | NOT IMPORTANT |
|                                         |                       |                      |                      |             |             |                                                  | -                        | 0.0% |                                 | 0 fewer per --<br>(from 0 fewer to 0 fewer)    |                  |               |
| case-control study - High school        |                       |                      |                      |             |             |                                                  |                          |      |                                 |                                                |                  |               |
| 2                                       | observational studies | serious <sup>a</sup> | not serious          | not serious | not serious | publication bias strongly suspected <sup>b</sup> | 1496 cases 1647 controls |      | OR 0.49<br>(0.30 to 0.79)       | -                                              | ⊕○○○<br>Very low | NOT IMPORTANT |
|                                         |                       |                      |                      |             |             |                                                  | -                        | 0.0% |                                 | 0 fewer per --<br>(from 0 fewer to 0 fewer)    |                  |               |
| case-control study - University         |                       |                      |                      |             |             |                                                  |                          |      |                                 |                                                |                  |               |
| 2                                       | observational studies | serious <sup>a</sup> | serious <sup>d</sup> | not serious | not serious | publication bias strongly suspected <sup>b</sup> | 1496 cases 1647 controls |      | OR 0.22<br>(0.06 to 0.86)       | -                                              | ⊕○○○<br>Very low | NOT IMPORTANT |
|                                         |                       |                      |                      |             |             |                                                  | -                        | 0.0% |                                 | 0 fewer per --<br>(from 0 fewer to 0 fewer)    |                  |               |
| case-control study - OA family history  |                       |                      |                      |             |             |                                                  |                          |      |                                 |                                                |                  |               |
| 4                                       | observational studies | serious <sup>a</sup> | not serious          | not serious | not serious | publication bias strongly suspected <sup>b</sup> | 1800 cases 2223 controls |      | OR 1.04<br>(0.98 to 1.10)       | -                                              | ⊕○○○<br>Very low | IMPORTANT     |
|                                         |                       |                      |                      |             |             |                                                  | -                        | 0.0% |                                 | 0 fewer per 1,000<br>(from 0 fewer to 0 fewer) |                  |               |
| case-control study - manual labour      |                       |                      |                      |             |             |                                                  |                          |      |                                 |                                                |                  |               |
| 4                                       | observational studies | serious <sup>a</sup> | not serious          | not serious | not serious | publication bias strongly suspected <sup>b</sup> | 720 cases 783 controls   |      | OR 1.11<br>(0.93 to 1.31)       | -                                              | ⊕○○○<br>Very low | IMPORTANT     |
|                                         |                       |                      |                      |             |             |                                                  | -                        | 0.0% |                                 | 0 fewer per 1,000<br>(from 0 fewer to 0 fewer) |                  |               |
| case-control study - agricultural labor |                       |                      |                      |             |             |                                                  |                          |      |                                 |                                                |                  |               |
| 2                                       | observational studies | serious <sup>a</sup> | not serious          | not serious | not serious | publication bias strongly suspected <sup>b</sup> | 269 cases 323 controls   |      | OR 1.17<br>(0.54 to 2.56)       | -                                              | ⊕○○○<br>Very low | IMPORTANT     |
|                                         |                       |                      |                      |             |             |                                                  | -                        | 0.0% |                                 | 0 fewer per 1,000<br>(from 0 fewer to 0 fewer) |                  |               |

| cohort study - manual labour  |                       |                      |             |             |             |                                                  |                          |      |                                  |                                                       |                  |               |
|-------------------------------|-----------------------|----------------------|-------------|-------------|-------------|--------------------------------------------------|--------------------------|------|----------------------------------|-------------------------------------------------------|------------------|---------------|
| 3                             | observational studies | serious <sup>a</sup> | not serious | not serious | not serious | none                                             | 1272/18346 (6.9%)        | -/0  | <b>OR 1.09</b><br>(0.88 to 1.35) | <b>1 fewer per 1,000</b><br>(from 1 fewer to 1 fewer) | ⊕○○○<br>Very low | IMPORTANT     |
| cohort study - drinking       |                       |                      |             |             |             |                                                  |                          |      |                                  |                                                       |                  |               |
| 3                             | observational studies | serious <sup>a</sup> | not serious | not serious | not serious | publication bias strongly suspected <sup>b</sup> | 3563/10710 (33.3%)       | -/0  | <b>OR 0.98</b><br>(0.79 to 1.21) | <b>1 fewer per 1,000</b><br>(from 1 fewer to 1 fewer) | ⊕○○○<br>Very low | NOT IMPORTANT |
| case-control study - drinking |                       |                      |             |             |             |                                                  |                          |      |                                  |                                                       |                  |               |
| 2                             | observational studies | serious <sup>a</sup> | not serious | not serious | not serious | none                                             | 287 cases 313 controls   |      | <b>OR 1.60</b><br>(0.40 to 6.45) | -                                                     | ⊕○○○<br>Very low | NOT IMPORTANT |
|                               |                       |                      |             |             |             |                                                  | -                        | 0.0% |                                  |                                                       |                  |               |
| cohort study - smoking        |                       |                      |             |             |             |                                                  |                          |      |                                  |                                                       |                  |               |
| 4                             | observational studies | serious <sup>a</sup> | not serious | not serious | not serious | none                                             | 3170/20608 (15.4%)       | -/0  | <b>OR 0.88</b><br>(0.74 to 1.04) | <b>1 fewer per 1,000</b><br>(from 1 fewer to 1 fewer) | ⊕○○○<br>Very low | NOT IMPORTANT |
| case-control study - smoking  |                       |                      |             |             |             |                                                  |                          |      |                                  |                                                       |                  |               |
| 3                             | observational studies | serious <sup>a</sup> | not serious | not serious | not serious | publication bias strongly suspected <sup>b</sup> | 987 cases 1013 controls  |      | <b>OR 1.09</b><br>(0.84 to 1.41) | -                                                     | ⊕○○○<br>Very low | NOT IMPORTANT |
|                               |                       |                      |             |             |             |                                                  | -                        | 0.0% |                                  |                                                       |                  |               |
| case-control study - exercise |                       |                      |             |             |             |                                                  |                          |      |                                  |                                                       |                  |               |
| 4                             | observational studies | serious <sup>a</sup> | not serious | not serious | not serious | publication bias strongly suspected <sup>b</sup> | 3713 cases 3995 controls |      | <b>OR 0.75</b><br>(0.62 to 0.91) | -                                                     | ⊕○○○<br>Very low | IMPORTANT     |
|                               |                       |                      |             |             |             |                                                  | -                        | 0.0% |                                  |                                                       |                  |               |

CI: confidence interval; OR: odds ratio

#### Explanations

- a. Most information is from studies at low or unclear risk of bias. Potential limitations are likely to lower confidence in the estimate of effect.
- b. Funnel plot asymmetry
- c. I<sup>2</sup>=55%
- d. I<sup>2</sup>=65%
